# Supplementary material for: Coping with the climate: Cuticular hydrocarbon acclimation of ants under constant and fluctuating conditions
Source: Oxford University Press journal article supplement (doi:10.1242/jeb.171488), 2018-01-01
Supplement: jeb171488supp.pdf [file jeb171488supp.pdf]

**Table S1. Cuticular hydrocarbon profiles of *M. rubra* and *M. ruginodis***

| #  | RI    | Substance           | Diagnostic ions (m/z)    | <i>M. rubra</i> | <i>M. ruginodis</i> |
|----|-------|---------------------|--------------------------|-----------------|---------------------|
|    |       |                     |                          | Mean±s.d.       | Mean±s.d.           |
| 1  | 19.01 | n-C19               | 268                      | 0.29±0.27       | 0.51±0.68           |
| 2  | 19.59 | unknown CHC         | -                        | 0.16±0.13       | -                   |
| 3  | 23.02 | n-C23               | 324                      | 0.28±0.37       | -                   |
| 4  | 23.53 | 5-MeC23             | 85/281                   | 0.13±0.12       | -                   |
| 5  | 24.02 | n-C24               | 338                      | 0.29±0.19       | 0.05±0.12           |
| 6  | 24.77 | C25-ene             | 350                      | 0.06±0.1        | -                   |
| 7  | 24.96 | C25-ene             | 350                      | 1.1±0.92        | -                   |
| 8  | 25.03 | n-C25               | 352                      | 5.51±4.41       | 0.12±0.16           |
| 9  | 25.36 | 9-,11-,13-MeC25     | 140/252; 168/224; 196    | 1.7±0.75        | -                   |
| 10 | 25.43 | 7-MeC25             | 112/280                  | 1.5±0.97        | -                   |
| 11 | 25.52 | 5-MeC25             | 84/308                   | 1.41±0.8        | -                   |
| 12 | 25.67 | 8,12-DiMeC25        | 126/280, 196/210         | 0.47±0.24       | -                   |
| 13 | 25.74 | 3-MeC25             | 56/336                   | 1.26±0.61       | -                   |
| 14 | 25.84 | 5,9-,5,11-DiMeC25   | 85/323, 154/252, 182/224 | 0.74±0.41       | -                   |
| 15 | 26.01 | n-C26               | 366                      | 0.61±0.26       | 0.05±0.07           |
| 16 | 26.11 | 3,x-DiMeC25         | 56/364                   | 0.37±0.16       | -                   |
| 17 | 26.36 | 10-MeC26*           | 154/252                  | 0.47±0.39       | -                   |
| 18 | 26.4  | 8-MeC26*            | 126/280                  | 0.82±0.56       | -                   |
| 19 | 26.64 | 10,14-DiMeC26       | 154/266, 224/196         | 0.34±0.3        | -                   |
| 20 | 26.68 | 8,12-DiMeC26        | 126/294, 196/224         | 0.5±2.04        | -                   |
| 21 | 26.77 | 6,10-, 6,12-DiMeC26 | 98/322, 168/252 196/224  | 0.34±0.24       | -                   |
| 22 | 26.98 | C27-ene             | 378                      | 1.83±1.56       | -                   |
| 23 | 27.01 | n-C27               | 380                      | 3.37±1.98       | 2.72±2.26           |
| 24 | 27.2  | 4,8,12-TriMeC26     | 70/378, 140/308, 210/238 | 0.32±0.33       | -                   |
| 25 | 27.34 | 11-,13-MeC27        | 168/252; 196/224         | -               | 0.18±0.15           |
| 26 | 27.36 | 9-,11-MeC27         | 140/280; 168/252         | 15.47±4.89      | -                   |

| #  | RI    | Substance                                                | Diagnostic ions (m/z)                          | M. rubra  | M. ruginodis |
|----|-------|----------------------------------------------------------|------------------------------------------------|-----------|--------------|
|    |       |                                                          |                                                | Mean±s.d. | Mean±s.d.    |
| 27 | 27.43 | 7-MeC27                                                  | 112/308                                        | 2.18±1.58 | 0.21±0.27    |
| 28 | 27.53 | 5-MeC27                                                  | 85/337                                         | 4.93±2.2  | 0.21±0.23    |
| 29 | 27.63 | 11,15-DiMeC27                                            | 168/266, 238/196                               | 5.39±2.47 | -            |
| 30 | 27.66 | 9,13-DiMeC27                                             | 140/294, 210/224                               | -         | 0.02±0.05    |
| 31 | 27.72 | 7,11-DiMeC27                                             | 112/323, 183/252                               | 8.15±3.77 | -            |
| 32 | 27.74 | 3-MeC27                                                  | 57/365                                         | 0.15±0.54 | 0.44±0.49    |
| 33 | 27.84 | 5,11-DiMeC27                                             | 85/351, 183/253                                | 5.23±2.35 | -            |
| 34 | 27.98 | 7,11,15-TriMeC27                                         | 112/337, 183/267, 253/197                      | 1.35±1.32 | -            |
| 35 | 28.01 | 7,11,21-TriMeC27                                         | 112/337, 183/267, 337/112                      | 0.68±0.56 | -            |
| 36 | 28.01 | n-C28                                                    | 394                                            | -         | 0.33±0.32    |
| 37 | 28.1  | 5,9,13-;5,9,15-TriMeC27                                  | 85/364, 154/294, 225,<br>253/197               | 1.6±0.59  | -            |
| 38 | 28.35 | 7-;10-;12-;13-;14-MeC28                                  | 112/323; 155/281;<br>181/253; 197/238; 210/225 | 1.87±0.78 | -            |
| 39 | 28.38 | 3,7,11-TriMeC27                                          | 56/392, 126/322, 196/252                       | 0.33±0.5  | -            |
| 40 | 28.46 | unknown CHC                                              | -                                              | 0.12±0.11 | -            |
| 41 | 28.64 | 3,7,11,15-TetraMeC27                                     | 57/407, 127/337, 197/267,<br>267/197           | 1.8±0.67  | -            |
| 42 | 28.64 | C29diene                                                 | 404                                            | -         | 0.42±0.61    |
| 43 | 28.68 | C29diene                                                 | 404                                            | -         | 0.92±0.74    |
| 44 | 28.73 | C29ene                                                   | 406                                            | -         | 1.23±0.56    |
| 45 | 28.76 | 3,x,y,z-TetraMeC27                                       | 56/406                                         | 0.36±0.29 | -            |
| 46 | 28.79 | C29-9-ene                                                | 406, [173, 327, 500]                           | -         | 4.18±1.52    |
| 47 | 28.86 | C29-7-ene                                                | 406, [145, 355, 500]                           | -         | 2.29±1.1     |
| 48 | 28.9  | C29ene                                                   | 406                                            | -         | 0.5±0.42     |
| 49 | 29.01 | n-C29                                                    | 408                                            | 1.62±1.12 | 5.22±4.25    |
| 50 | 29.18 | 4,8,16-TriMeC28 (position of 3rd methyl group tentative) | 71/393, 141/323, 267/196                       | 0.04±0.08 | -            |
| 51 | 29.24 | x-MeC29-diene                                            | -                                              | -         | 0.3±0.24     |

| #  | RI    | Substance            | Diagnostic ions (m/z)                 | M. rubra  | M. ruginodis |
|----|-------|----------------------|---------------------------------------|-----------|--------------|
|    |       |                      |                                       | Mean±s.d. | Mean±s.d.    |
| 52 | 29.33 | 9-;11-;13-;15-MeC29  | 141/308; 167/281;<br>197/252; 224     | 8.32±2.85 | 7±2          |
| 53 | 29.42 | 7-MeC29              | 112/336                               | 1.06±0.64 | 0.16±0.44    |
| 54 | 29.52 | 5-MeC29              | 84/364                                | 1.83±0.97 | 1.5±0.9      |
| 55 | 29.6  | 11,15-;13,17-DiMeC29 | 168/295, 239/224;<br>196/267, 267/196 | 3.27±1.56 | 0.68±0.81    |
| 56 | 29.7  | 9,13-; 7,11-DiMeC29  | 140/322, 210/252;<br>112/350, 182/280 | -         | 0.49±0.74    |
| 57 | 29.74 | 3-MeC29              | 57/393                                | 2.51±0.86 | 2.24±0.85    |
| 58 | 29.82 | 5,17-DiMeC29         | 85/379, 267/196                       | 2.64±0.93 | 0.63±0.37    |
| 59 | 29.87 | 5-21-DiMeC29*        | 85/379, 323/140                       | 0.05±0.11 | -            |
| 60 | 29.98 | 7,11,17-TriMeC29     | 112/364, 183/296, 281/196             | 0.29±0.31 | -            |
| 61 | 30.05 | n-C30                | 422                                   | -         | 0.21±0.21    |
| 62 | 30.07 | 3,11*-DiMeC29        | 56/406, 182/280                       | 0.53±0.37 | -            |
| 63 | 30.31 | 10-;12-;13-;14-MeC30 | 154/308; 182/280;<br>196/266; 210/252 | 0.46±0.25 | 0.59±0.31    |
| 64 | 30.36 | unknown CHC          | -                                     | 0.12±0.14 | -            |
| 65 | 30.49 | C31diene             | 432                                   | -         | 0.11±0.14    |
| 66 | 30.55 | C31diene             | 432                                   | -         | 0.42±0.53    |
| 67 | 30.65 | C31diene             | 432                                   | -         | 4.76±1.94    |
| 68 | 30.65 | 2-;4-MeC30           | 43/420; 71/393                        | 0.62±0.5  | -            |
| 69 | 30.7  | C31diene             | 432                                   | -         | 14.35±6.61   |
| 70 | 30.7  | C31-11-ene           | 434, [201, 327, 528]                  | -         | 2.44±3.61    |
| 71 | 30.8  | C31diene             | 432                                   | -         | 1.67±2.54    |
| 72 | 30.8  | C31-9-ene            | 434, [173, 355, 528]                  | -         | 8.63±5.28    |
| 73 | 30.87 | C31ene               | 434                                   | -         | 0.68±0.98    |
| 74 | 30.91 | C31ene               | 434                                   | -         | 0.92±0.77    |
| 75 | 31    | n-C31                | 436                                   | -         | 0.46±0.63    |
| 76 | 31.16 | unknown CHC          | -                                     | -         | 0.32±0.39    |

| #   | RI    | Substance                             | Diagnostic ions (m/z)                          | M. rubra  | M. ruginodis |
|-----|-------|---------------------------------------|------------------------------------------------|-----------|--------------|
|     |       |                                       |                                                | Mean±s.d. | Mean±s.d.    |
| 77  | 31.21 | 13-;14-MeC31ene                       | 448, 194/278, 210/266                          | -         | 1.51±0.82    |
| 78  | 31.3  | 9-;11-;13-;15-MeC31                   | 140/336; 168/308;<br>196/280; 224/252          | -         | 6.33±2.37    |
| 79  | 31.32 | 13-;15-MeC31                          | 196/280; 224/252                               | 1.35±0.94 | -            |
| 80  | 31.41 | 7-MeC31                               | 112/364                                        | 0.19±0.18 | -            |
| 81  | 31.44 | cf. Methyltrien (unknown unsaturated) | -                                              | -         | 0.42±0.45    |
| 82  | 31.52 | 5-MeC31                               | 85/392                                         | 0.04±0.12 | -            |
| 83  | 31.56 | 13,17-DiMeC31                         | 196/295, 267/224                               | 0.98±0.81 | 3.46±2.49    |
| 84  | 31.62 | 13,21-DiMeC31*                        | 196/294, 322/168                               | 0.07±0.12 | -            |
| 85  | 31.65 | 9,17-;9,19-;9,21-DiMeC31              | 140/350, 266/224,<br>294/196, 322/168          | -         | 2.48±2.17    |
| 86  | 31.7  | unknown CHC                           | -                                              | 0.13±0.15 | -            |
| 87  | 31.74 | 3-MeC31                               | 57/420                                         | -         | 0.83±0.67    |
| 88  | 31.8  | 5,15-;5,17-DiMeC31                    | 85/407, 239/252, 267/224                       | 0.19±0.14 | 1.08±0.64    |
| 89  | 32.04 | 3,15-DiMeC31                          | 57/435, 239/252                                | -         | 0.3±0.28     |
| 90  | 32.3  | 12-;13-;14-;15-;16-MeC32              | 182/308; 196/294;<br>210/280; 224/267; 238/252 | 0.04±0.08 | 0.22±0.22    |
| 91  | 32.51 | C33diene                              | 460                                            | -         | 0.54±0.52    |
| 92  | 32.57 | C33diene                              | 460                                            | -         | 1.78±0.98    |
| 93  | 32.65 | C33diene                              | 460                                            | -         | 4.63±1.89    |
| 94  | 32.73 | C33diene                              | 460                                            | -         | 1.46±1.14    |
| 95  | 32.79 | C33diene                              | 460                                            | -         | 0.87±1.11    |
| 96  | 32.87 | C33ene                                | 462                                            | -         | 0.14±0.2     |
| 97  | 33.13 | unknown CHC                           | -                                              | -         | 0.1±0.16     |
| 98  | 33.3  | 11-;13-;15-;17-MeC33                  | 169/336; 196/309;<br>224/280; 252              | 0.07±0.16 | 1.11±0.89    |
| 99  | 33.46 | unknown CHC                           | -                                              | 0.05±0.13 | -            |
| 100 | 33.54 | 13,17-;13,19-DiMeC33                  | 196/323, 267/252, 295/224                      | -         | 0.62±0.59    |
| 101 | 33.61 | 9,x-;11,x-DiMeC33 [x=17 or 19]        | 140/379, 168/350,<br>267/252, 294/224          | -         | 0.59±0.6     |

| #   | RI    | Substance                                                                    | Diagnostic ions (m/z)                                               | <i>M. rubra</i> | <i>M. ruginodis</i> |
|-----|-------|------------------------------------------------------------------------------|---------------------------------------------------------------------|-----------------|---------------------|
|     |       |                                                                              |                                                                     | Mean±s.d.       | Mean±s.d.           |
| 102 | 33.67 | unknown CHC                                                                  | -                                                                   | -               | 0.05±0.11           |
| 103 | 33.78 | 5,21-;5,23-DiMeC33                                                           | 84/434, 322/196, 350/168                                            | -               | 0.43±0.35           |
| 104 | 34.04 | 3,15-DiMeC33                                                                 | 56/462, 238/280                                                     | -               | 0.12±0.24           |
| 105 | 34.45 | C35diene                                                                     | 488                                                                 | -               | 0.31±0.39           |
| 106 | 34.49 | C35diene                                                                     | 488                                                                 | -               | 0.34±0.38           |
| 107 | 34.55 | C35diene                                                                     | 488                                                                 | -               | 1.33±1.06           |
| 108 | 34.65 | C35diene                                                                     | 488                                                                 | -               | 0.22±0.35           |
| 109 | 35.24 | 13-;15-;17-MeC35                                                             | 196/336; 224/338; 252/280                                           | -               | 0.09±0.18           |
| 110 | 35.4  | 15,x-DiMeC35                                                                 | 224/322                                                             | 0.02±0.07       | -                   |
| 111 | 35.45 | 15,19-DiMeC35                                                                | 224/322, 294/252                                                    | -               | 0.23±0.37           |
| 112 | 35.51 | 11/13/15/17,19/21/23-DiMeC35 (combination of methyl group positions unknown) | 168/378, 196/350,<br>224/322, 252/294,<br>294/252, 322/224, 350/196 | -               | 0.12±0.16           |
| 113 | 36.41 | C37diene                                                                     | 516                                                                 | -               | 0.13±0.22           |

Overall, we detected and identified 64 hydrocarbon peaks in *M. rubra* and 69 peaks in *M. ruginodis*. The table shows the retention index (Kovats index; RI) (Carlson et al., 1998), substance name, diagnostic ions (mass peaks are printed in italics) and its mean percentage±s.d. Double bond positions for most abundant substances were determined by DMDS derivatisation (see diagnostic ions in brackets). Tentative identifications are marked by asterisks.

**Table S2.** Effects of acclimation conditions on the abundance of mono-, tri- and tetramethyl alkanes, as well as the overall profile. The table shows results from linear mixed effects models (LME) with temperature, humidity and caste as fixed factors and colony ID and sampling location as random factors. For the overall profiles, PERMANOVA with the same fixed and random factors was used. Test statistics are  $\chi^2$  (LME) or pseudo-F (PERMANOVA). Superscript letters denote whether data were a) log-, b) logit-, c) arcsine-square root- transformed, d) not transformed.

| Species             | Dependent variable                | Fixed factor      | N   | df   | $\chi^2$ or<br>Pseudo-F | p        |
|---------------------|-----------------------------------|-------------------|-----|------|-------------------------|----------|
| <i>M. rubra</i>     | mono-methyl alkanes <sup>c</sup>  | Temperature       | 470 | 3    | 17.53                   | 0.0005   |
|                     |                                   | Humidity          |     | 1    | 0.72                    | 0.40     |
|                     |                                   | Caste             |     | 1    | 23.98                   | < 0.0001 |
|                     | tri-methyl alkanes <sup>d</sup>   | Temperature       | 466 | 3    | 114.83                  | < 0.0001 |
|                     |                                   | Humidity          |     | 1    | 0.57                    | 0.45     |
|                     |                                   | Caste             |     | 1    | 29.42                   | < 0.0001 |
|                     | tetra-methyl alkanes <sup>c</sup> | Temperature       | 480 | 3    | 82.00                   | < 0.0001 |
|                     |                                   | Humidity          |     | 1    | 7.62                    | 0.0006   |
|                     |                                   | Caste             |     | 1    | 24.72                   | < 0.0001 |
|                     | overall profile <sup>d</sup>      | Temperature       | 480 | 3    | 69.54                   | 0.001    |
|                     |                                   | Humidity          |     | 1    | 4.01                    | 0.007    |
|                     |                                   | Caste             |     | 1    | 20.01                   | 0.001    |
|                     |                                   | Temp. x Hum.      |     | 3    | 1.94                    | 0.015    |
|                     |                                   | Temp. x Caste     |     | 3    | 1.68                    | 0.053    |
|                     |                                   | Hum. x Caste      |     | 1    | 2.46                    | 0.025    |
| 3-way interaction   |                                   |                   | 3   | 0.55 | 0.920                   |          |
|                     |                                   |                   |     |      |                         |          |
| <i>M. ruginodis</i> | mono-methyl alkanes <sup>c</sup>  | Temperature       | 480 | 3    | 60.66                   | < 0.0001 |
|                     |                                   | Humidity          |     | 1    | 37.01                   | < 0.0001 |
|                     |                                   | Caste             |     | 1    | 19.88                   | < 0.0001 |
|                     |                                   | Temp. x Hum.      |     | 3    | 16.25                   | 0.0010   |
|                     |                                   | Temp. x Caste     |     | 3    | 13.50                   | 0.0037   |
|                     | overall profile <sup>d</sup>      | Temperature       | 480 | 3    | 76.73                   | 0.001    |
|                     |                                   | Humidity          |     | 1    | 18.16                   | 0.001    |
|                     |                                   | Caste             |     | 1    | 23.29                   | 0.001    |
|                     |                                   | Temp. x Hum.      |     | 3    | 2.84                    | 0.002    |
|                     |                                   | Temp. x Caste     |     | 3    | 2.14                    | 0.008    |
|                     |                                   | Hum. x Caste      |     | 1    | 1.28                    | 0.230    |
|                     |                                   | 3-way interaction |     | 3    | 1.52                    | 0.075    |

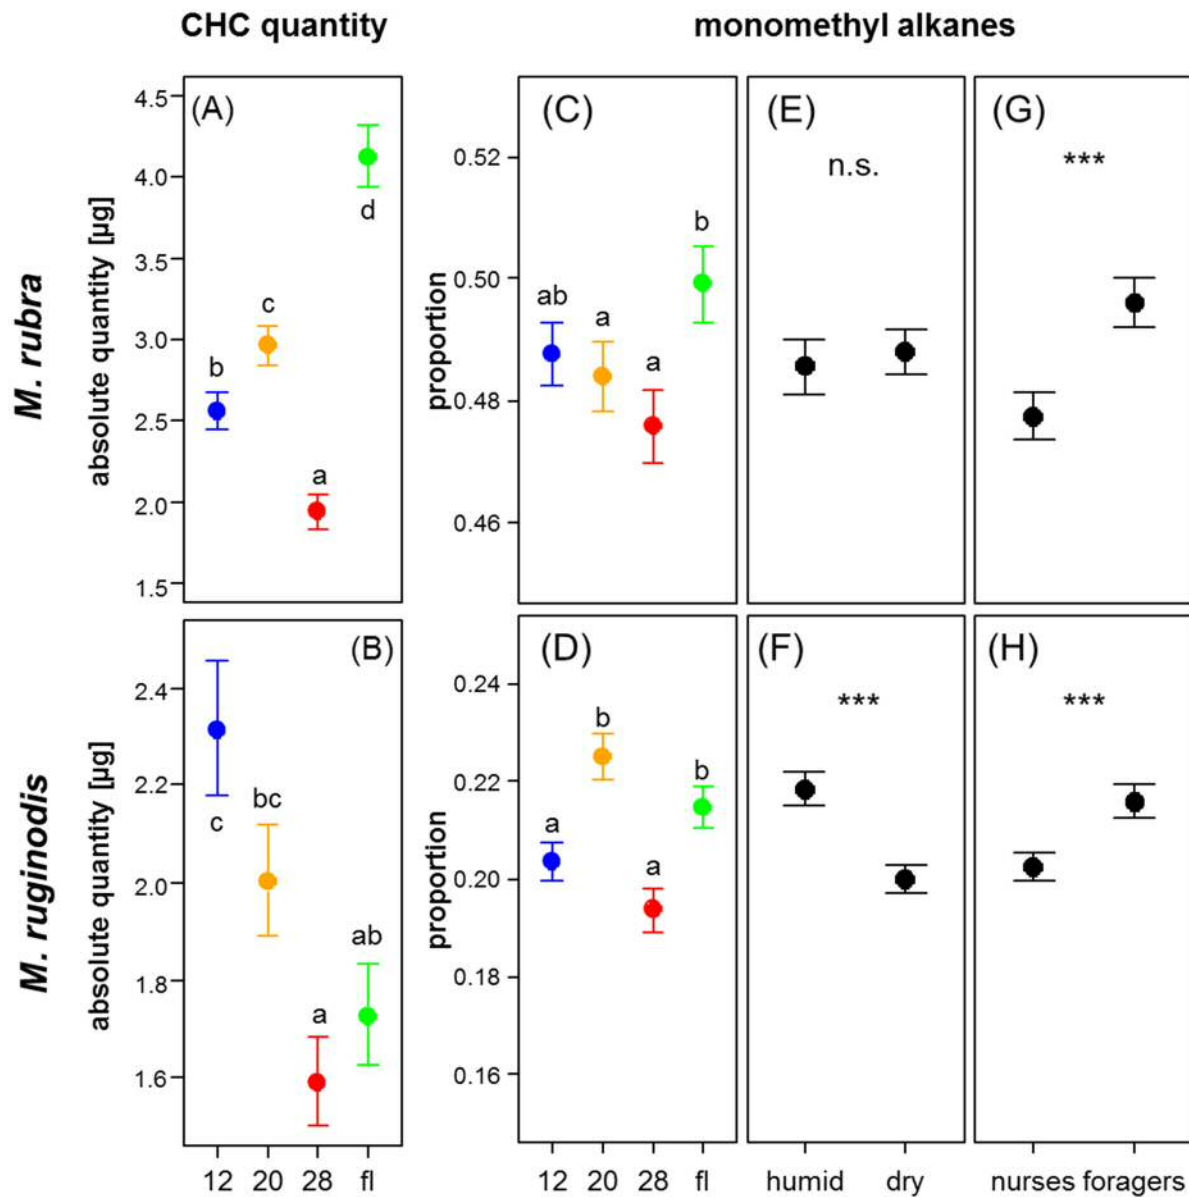

**Fig. S1.** Effect of temperature on absolute CHC amounts and effects on mono-methyl alkanes in *M. rubra* and *M. ruginodis*. All plots show back-transformed means  $\pm$  SE. Different letters indicate statistically significant differences according to pairwise Tukey-tests on the LME data ( $p < 0.05$ ; A-D). Significant differences are indicated by asterisks, \*\*\*  $p < 0.001$ , \*\*  $p < 0.01$ , \*  $p < 0.05$ ; LME (E-H).

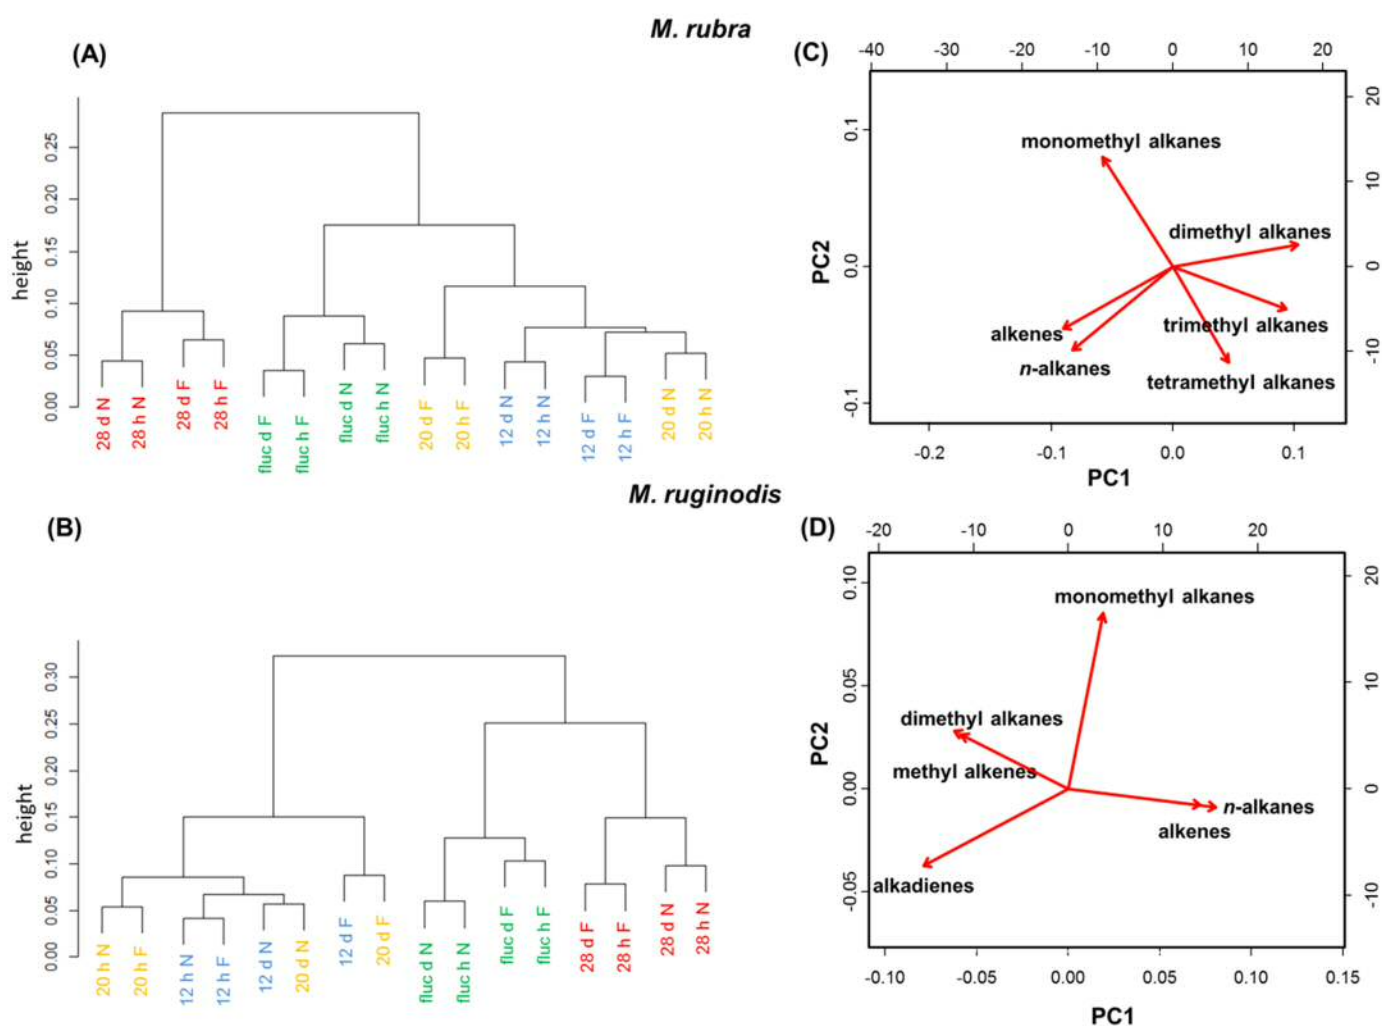

**Fig. S2.** Cluster dendrograms for a complete linkage hierarchical cluster analysis based on the Bray-Curtis similarity of the average chemical profiles of the different treatment groups (A+B) and co-variation of CHC classes, calculated based on factor loadings of a principal component analysis (PCs) for *M. rubra* (C) and *M. ruginodis* (D). In the cluster dendrograms (A+B) treatment groups are shown according to temperature treatment (12°C, 20°C, 28°C and fluctuating; colour-coded), humidity (d – dry and h – humid) and behavioural caste (F – forager and N – nurse). The co-variation plots (C+D) show the correlation coefficients of the different substance classes with the PC axes.



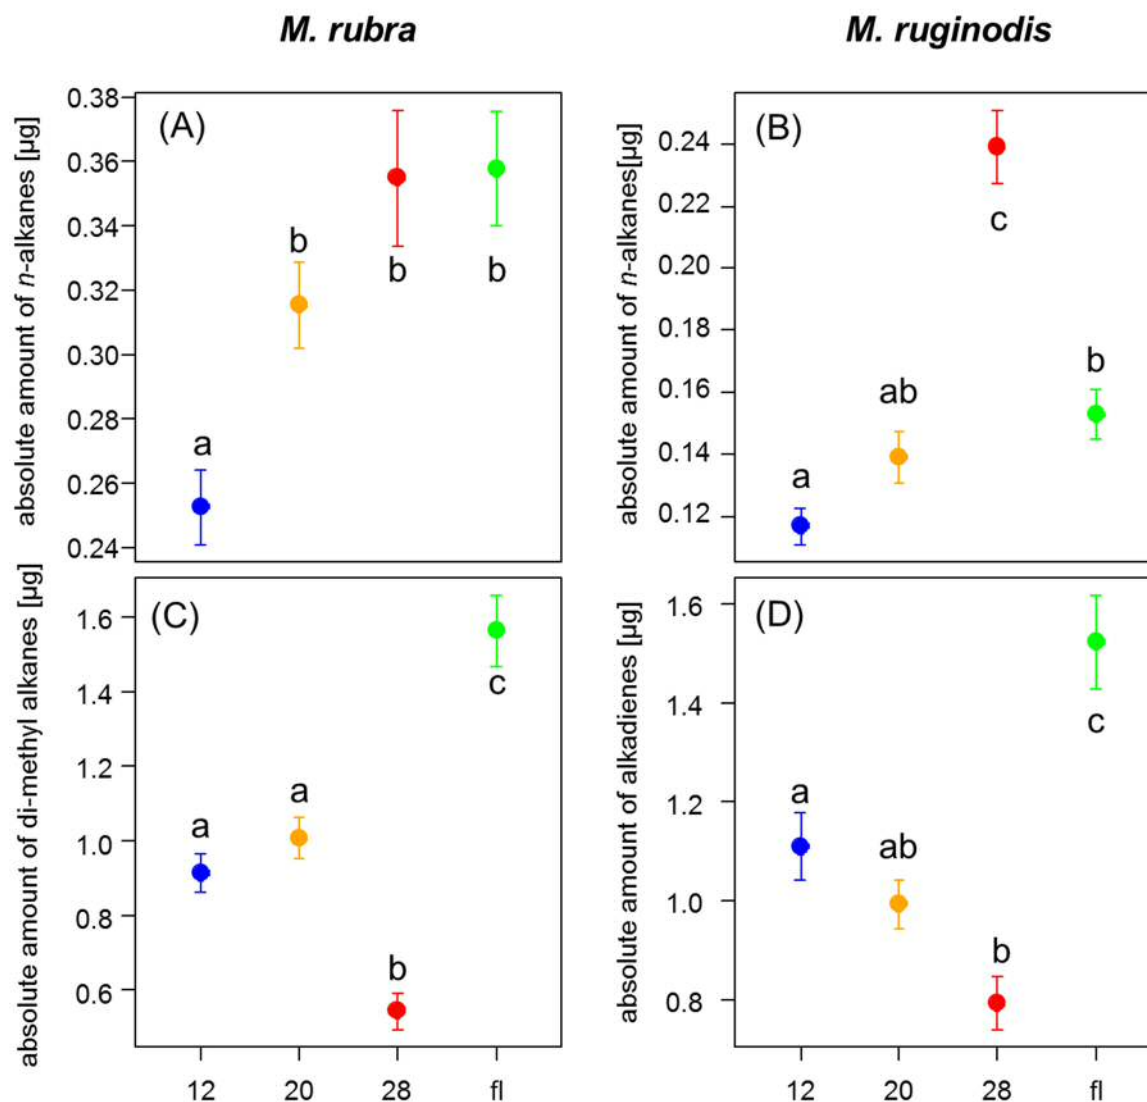

**Fig S3.** Absolute quantities of *n*-alkanes (A, B), di-methyl alkanes (C) and alkadienes (D) per temperature regime. All plots show means  $\pm$  SE. Different letters indicate statistically significant differences according to pairwise Tukey-tests on the LME data ( $p < 0.05$ ).

(A) In *M. rubra* the amount of *n*-alkanes was lowest in 12°C treated ants (LME:  $\chi^2_3 = 38.57$ ,  $p < 0.001$ ). Further, it was higher in workers from the dry treatment ( $\chi^2_1 = 114.77$ ,  $p < 0.001$ ) as well as foragers compared to nurses ( $\chi^2_1 = 8.44$ ,  $p = 0.004$ ).

(B) In *M. ruginodis* effects of temperature on the absolute amount of *n*-alkanes were significant ( $\chi^2_3 = 153.36$ ,  $p < 0.001$ ), as were effects of humidity ( $\chi^2_1 = 103.53$ ,  $p < 0.001$ ). In the dry treatments, 20°C ants had more *n*-alkanes than those at 12°C, but not so in the humid

treatment (temperature x humidity:  $\chi^2_3 = 16.02$ ,  $p = 0.001$ ).

(C) Di-methyl alkanes in *M. rubra* were most abundant in the fluctuating temperature treatment and least common in 28°C ( $\chi^2_3 = 187.78$ ,  $p < 0.001$ ). They were also less abundant in the humid treatment (presumably because of the higher overall amount of CHC under dry conditions,  $\chi^2_1 = 25.95$ ,  $p < 0.001$ ). Also nurses possessed more di-methyl alkanes than foragers ( $\chi^2_1 = 21.56$ ,  $p < 0.001$ ).

(D) The absolute amount of alkadienes in *M. ruginodis* was dependent on the acclimation temperature ( $\chi^2_3 = 70.89$ ,  $p < 0.001$ ) as they were most abundant under fluctuating temperatures and least common under 28°C, but however not on humidity ( $\chi^2_1 = 0.62$ ,  $p = 0.43$ ). Finally, nurses had more alkadienes than foragers ( $\chi^2_1 = 10.07$ ,  $p = 0.002$ ).

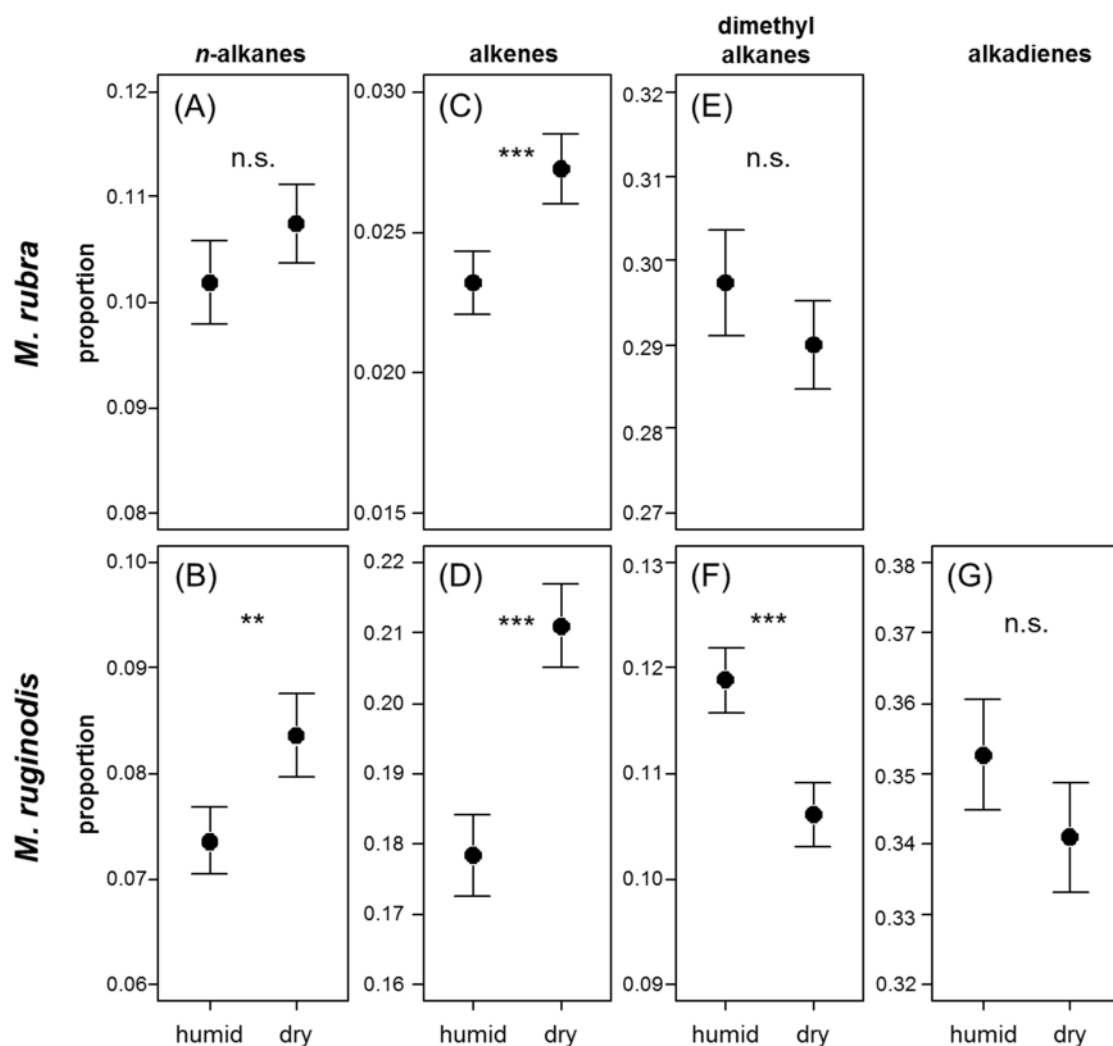

**Fig. S4.** Effects of humidity on the ants' CHC profiles. The upper row shows *M. rubra*, the bottom row *M. ruginodis*. Plotted are effects of the two different humidity treatments on the proportions of *n*-alkanes (A,B), di-methyl alkanes (C,D), alkenes (E,F) and alkadienes (G). All plots show back-transformed means  $\pm$  SE. Significant differences are indicated by asterisks, \*\*\*  $p < 0.001$ , \*\*  $p < 0.01$ , \*  $p < 0.05$ ; LME.

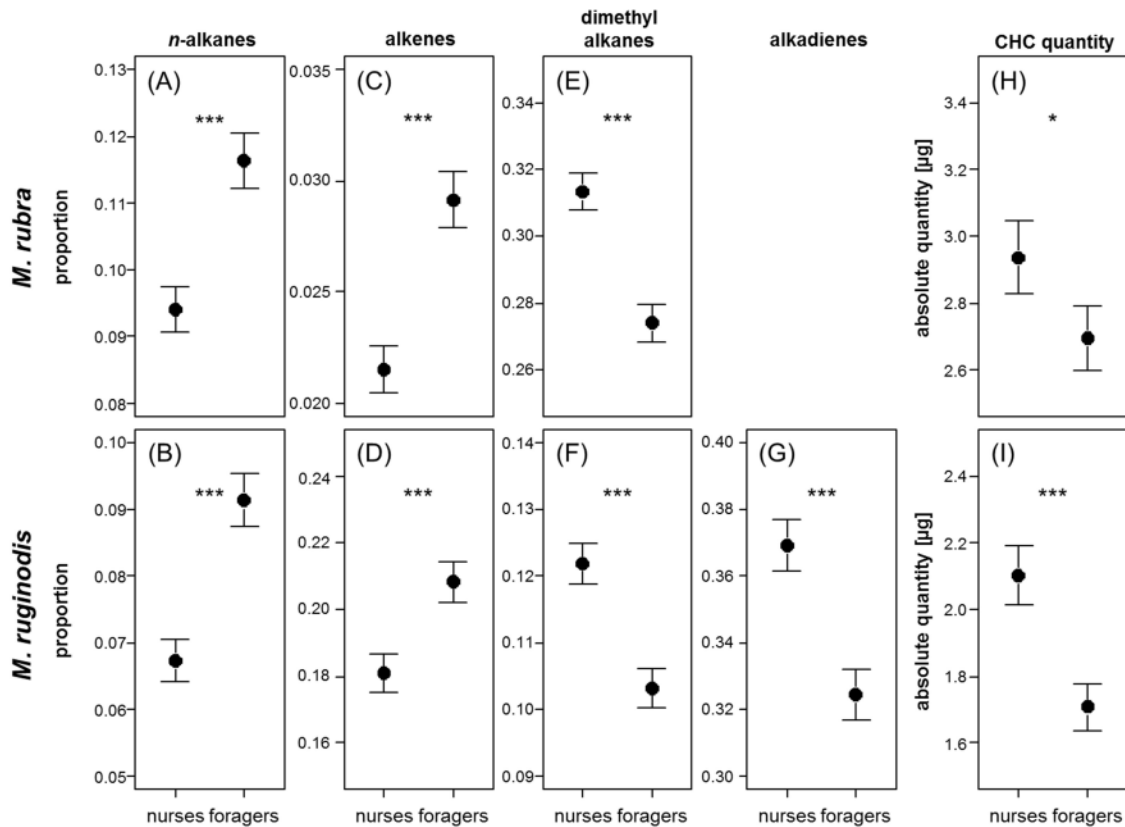

**Fig. S5.** Differences between nurses and foragers. The top row shows differences in *M. rubra*, the bottom row in *M. ruginodis*. Plotted are differences between nurses and foragers in the proportions of *n*-alkanes (A,B), di-methyl alkanes (C,D), alkenes (E,F), alkadienes (G) and the absolute amount of CHC (H,I). All plots show back-transformed means  $\pm$  SE. Significant differences are indicated by asterisks, \*\*\*  $p < 0.001$ , \*\*  $p < 0.01$ , \*  $p < 0.05$ ; LME.
